# Supplementary material
Source: PubMed Central journal article supplement (PMC5261137)
Supplement: NIHMS843686-supplement-Supporting.pdf [file NIHMS843686-supplement-Supporting.pdf]

Supplementary Materials

NMR Identification of the Binding Surfaces Involved in the *Salmonella* and *Shigella* Type III Secretion Tip-Translocon Protein-Protein Interactions

Andrew C. McShan, Kawaljit Kaur, Srirupa Chatterjee, Kevin M. Knight, & R. N. De Guzman  
Department of Molecular Biosciences, University of Kansas, Lawrence, KS 66045 USA

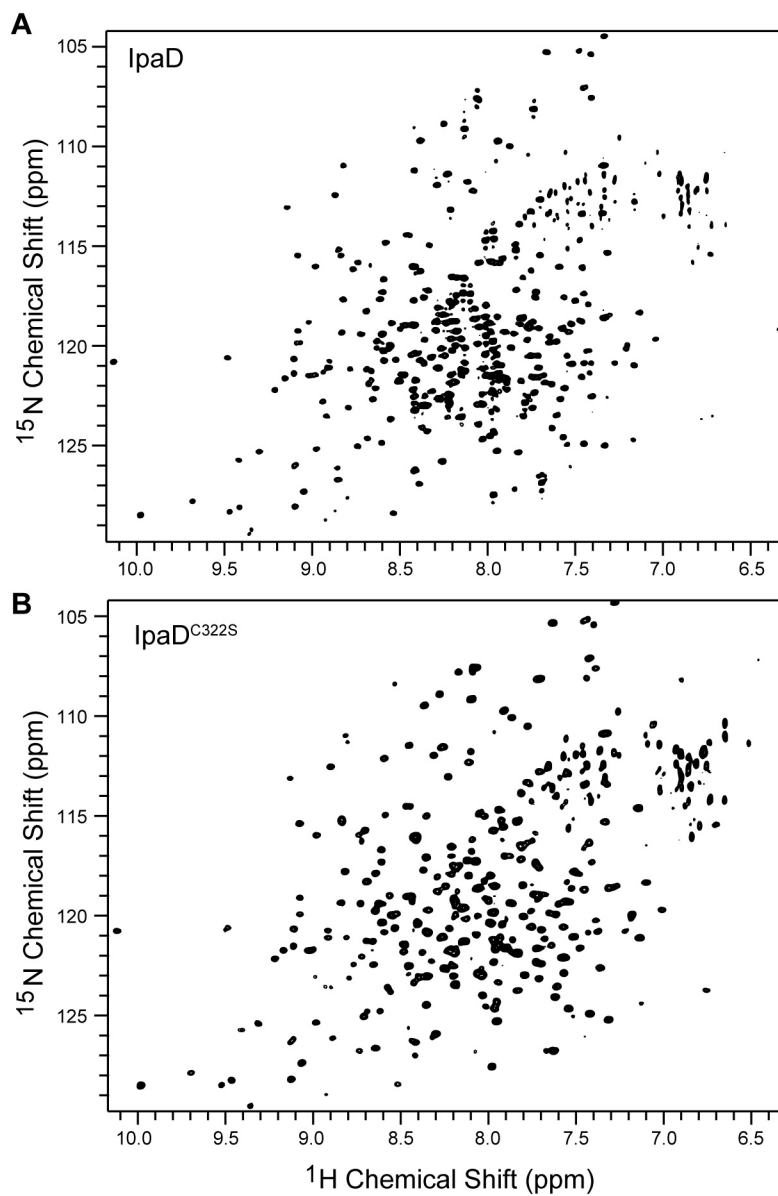

Figure S1. Comparison of <sup>1</sup>H-<sup>15</sup>N TROSY spectra of (A) IpaD and (B) IpaD<sup>C322S</sup>.

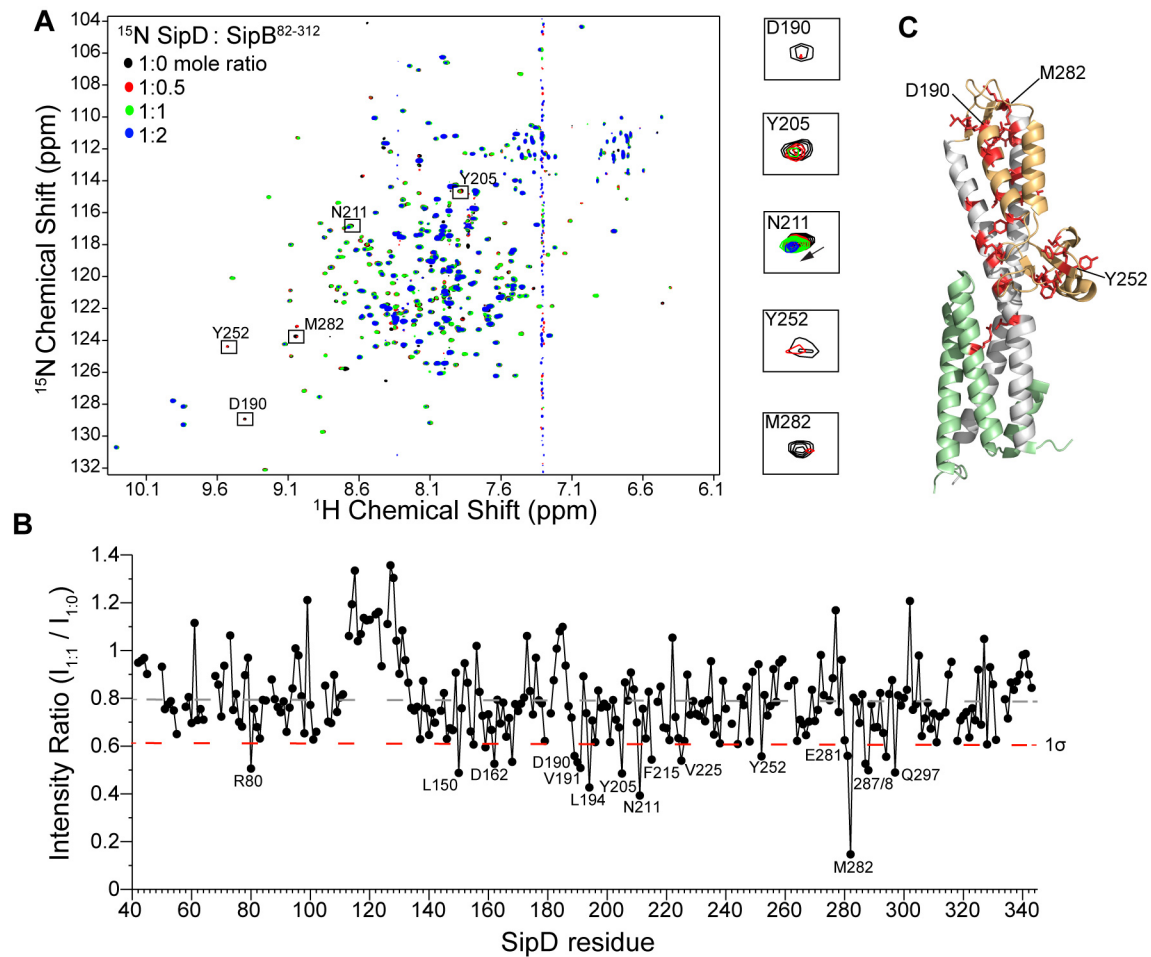

**Figure S2.** SipB<sup>82-312</sup> interacts with SipD<sup>C244S</sup>. **(A)** Overlay of four  $^1\text{H}$ - $^{15}\text{N}$  TROSY spectra of  $^{15}\text{N}$ /ILV SipD<sup>C244S</sup> with increasing concentrations of unlabeled SipB<sup>82-312</sup>. **(B)** Plot of peak intensity ratio ( $I_{1:1}/I_{1:0}$ ) at SipD<sup>C244S</sup>:SipB<sup>82-312</sup> molar ratio of 1:1.1 **(C)** Residues with peak intensity ratio ( $I_{1:1}/I_{1:0}$ ) lower than 1 standard deviation below average ( $1\sigma$ ) are mapped onto the crystal structure of SipD<sup>C244S</sup>.

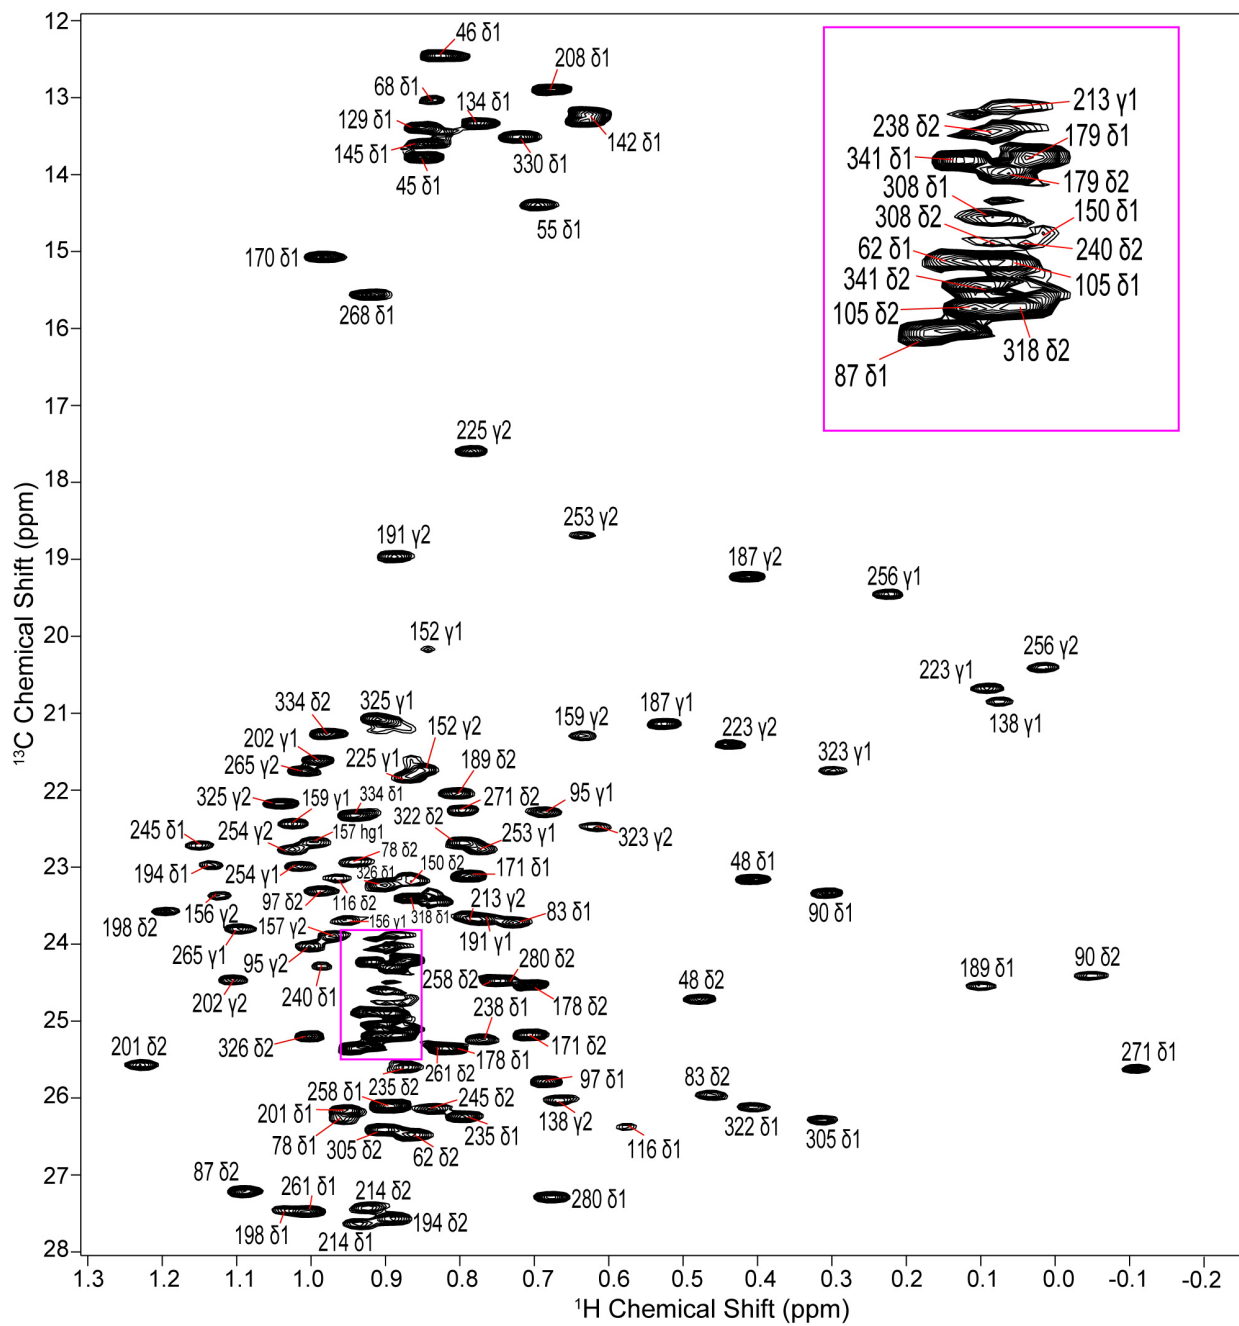

**Figure S3.** Complete stereospecific ILV assignments of SipD<sup>C244S</sup>.

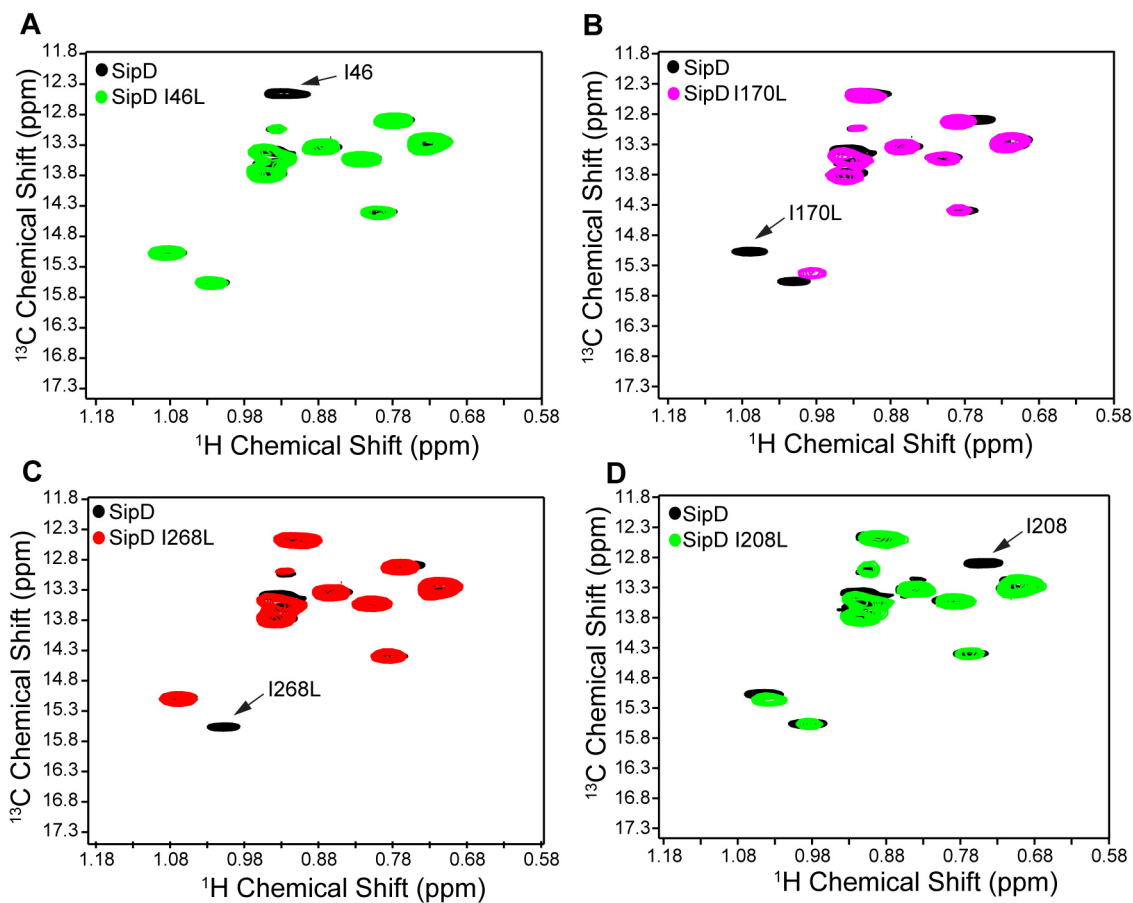

**Figure S4.** Ile to Leu mutations used in assigning the isoleucine  $^{13}\text{C}\delta 1$  methyl peaks of SipD<sup>C244S</sup>. Representative examples of  $^1\text{H}$ - $^{13}\text{C}$  HSQC spectra of  $^{15}\text{N}$ /ILV SipD<sup>C244S</sup> with point mutations in (A) I46L (B) I170L (C) I268L (D) I208L overlaid with the  $^1\text{H}$ - $^{13}\text{C}$  HSQC spectrum of wild type SipD<sup>C244S</sup> used in assignment of isoleucine  $^{13}\text{C}\delta 1$  peak.

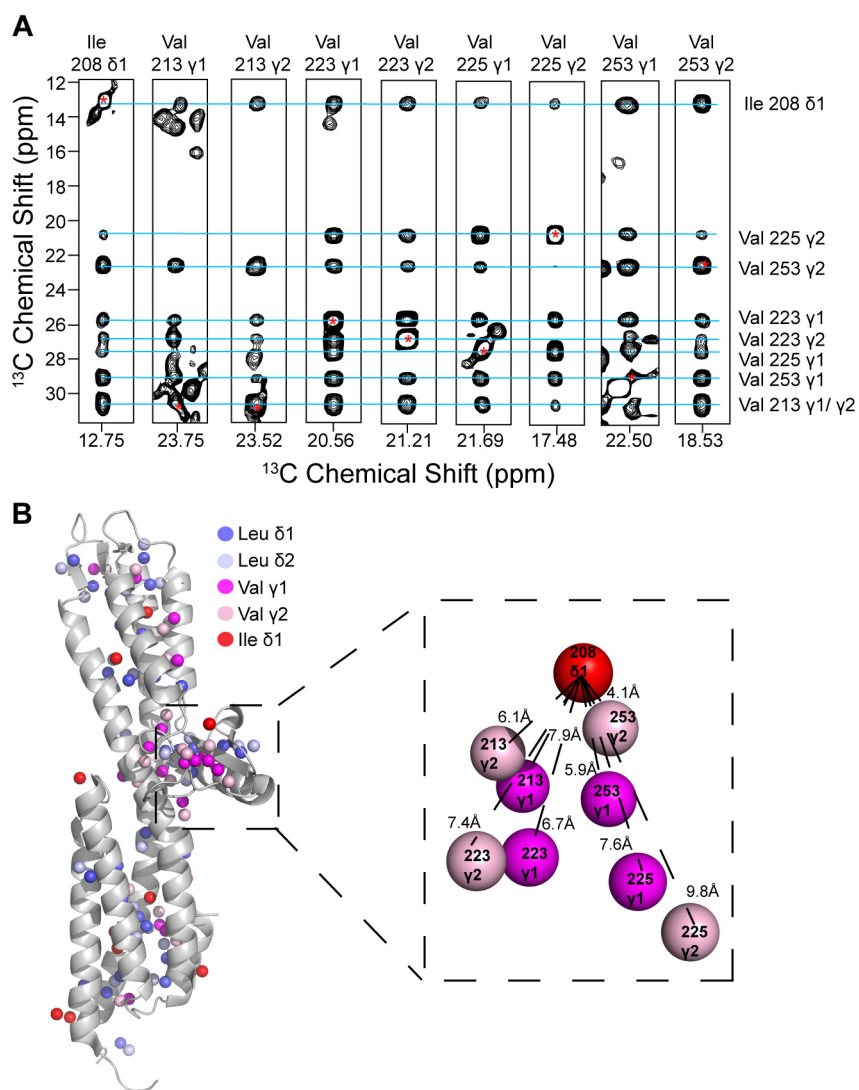

**Figure S5.** Representative strips from 3D  $^1\text{H}$ - $^{13}\text{C}$ - $^{13}\text{C}$  HMQC-NOESY-HMQC used in assigning the ILV resonances of SipD<sup>C244S</sup>. **(A)** Strips from a 3D  $^1\text{H}$ - $^{13}\text{C}$ - $^{13}\text{C}$  HMQC-NOESY-HMQC dataset of perdeuterated  $^{15}\text{N}$ /ILV-labeled SipD<sup>C244S</sup>. Asterisks mark the cross peak for each residue; NOEs with other residues are shown in blue lines. **(B)** Example of distance information from the crystal structure of SipD<sup>C244S</sup> used in assigning the ILV resonances of SipD<sup>C244S</sup>, with ILV methyls shown in spheres (Ile, red; Leu, blue & light blue; Val, pink & light pink). An expanded region showing the ILV methyls close to I208 shown with distances that correlated with the NOE peak intensities.

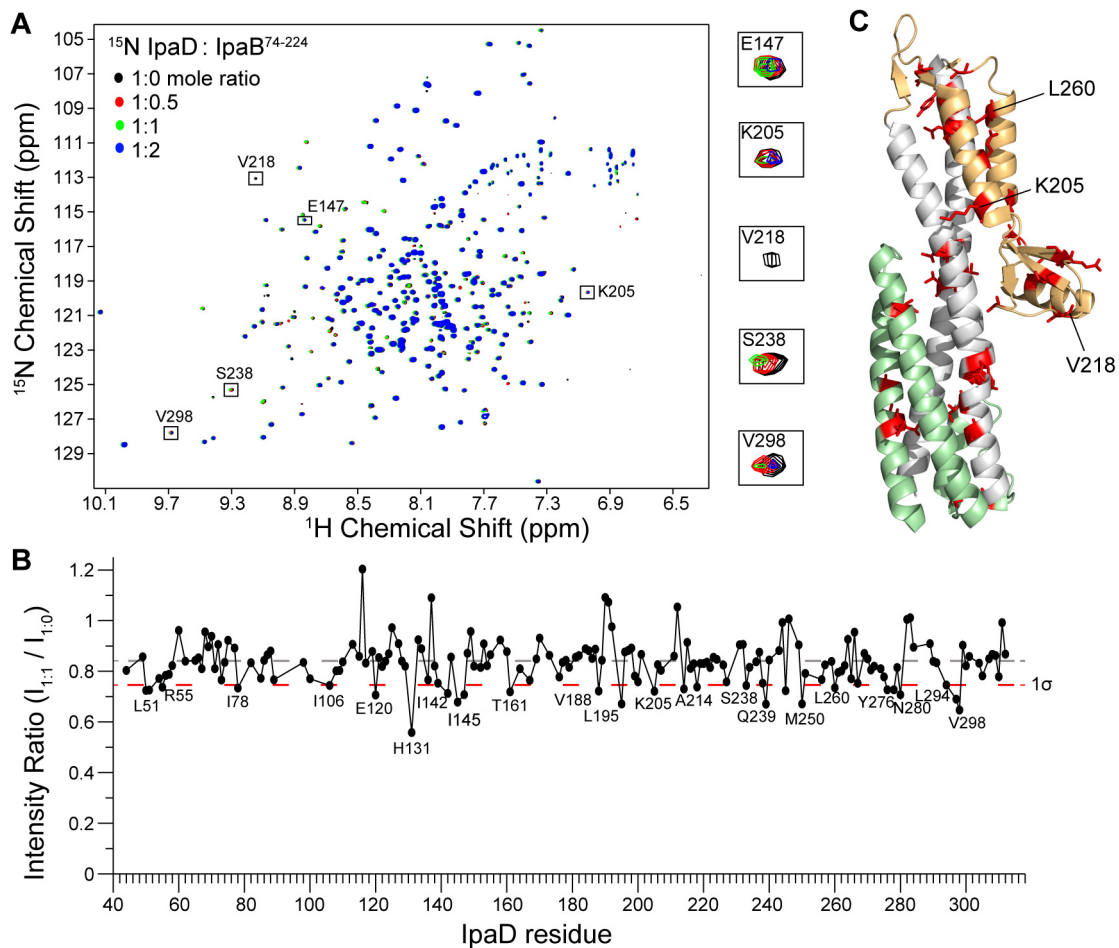

**Figure S6.** IpaB<sup>74-224</sup> interacts with IpaD. **(A)** Overlay of four  $^1\text{H}$ - $^{15}\text{N}$  TROSY spectra of  $^{15}\text{N}$ /ILV IpaD with increasing concentrations of unlabeled IpaB<sup>74-224</sup>. **(B)** Plot of peak intensity ratio ( $I_{1:1}/I_{1:0}$ ) at IpaD:IpaB<sup>74-224</sup> molar ratio of 1:1.1. **(C)** Residues with peak intensity ratio ( $I_{1:1}/I_{1:0}$ ) lower than 1 standard deviation below average ( $1\sigma$ ) are mapped onto the crystal structure of IpaD.

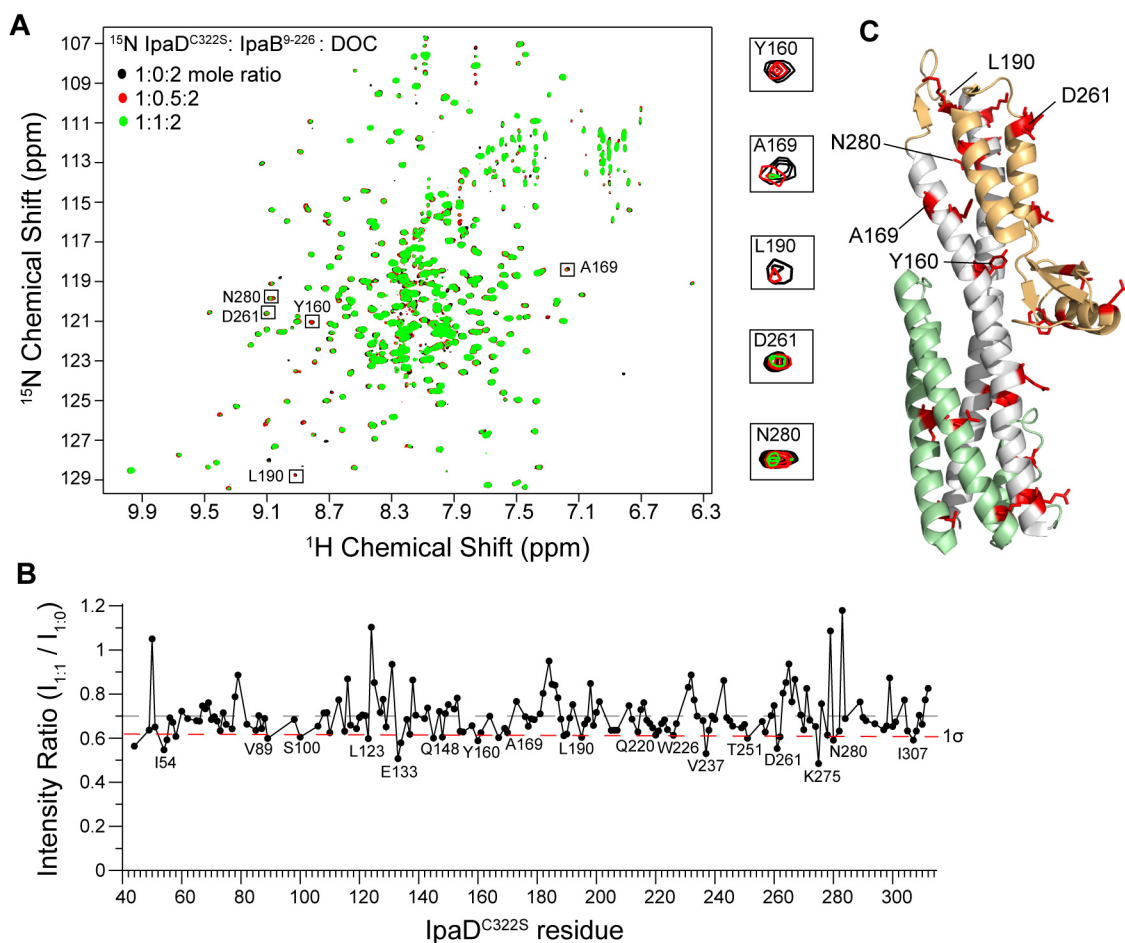

**Figure S7.** Deoxycholate (DOC) did not alter the surfaces of IpaD involved in binding IpaB. **(A)** Overlay of three  $^1\text{H}$ - $^{15}\text{N}$  TROSY spectra of  $^{15}\text{N}$ /ILV IpaD<sup>C322S</sup> in the presence of 0.4 mM DOC with increasing concentrations of unlabeled IpaB<sup>9-226</sup>. **(B)** Plot of peak intensity ratio ( $I_{1,1}/I_{1,0}$ ) at IpaD<sup>C322S</sup>:IpaB<sup>9-226</sup> molar ratio of 1:1.1. **(C)** Residues with peak intensity ratio ( $I_{1,1}/I_{1,0}$ ) lower than 1 standard deviation below average ( $1\sigma$ ) are mapped onto the crystal structure of IpaD. The presence **(C)** or absence of DOC (Fig. 3C) resulted in the same surfaces of IpaD perturbed upon titration with IpaB.

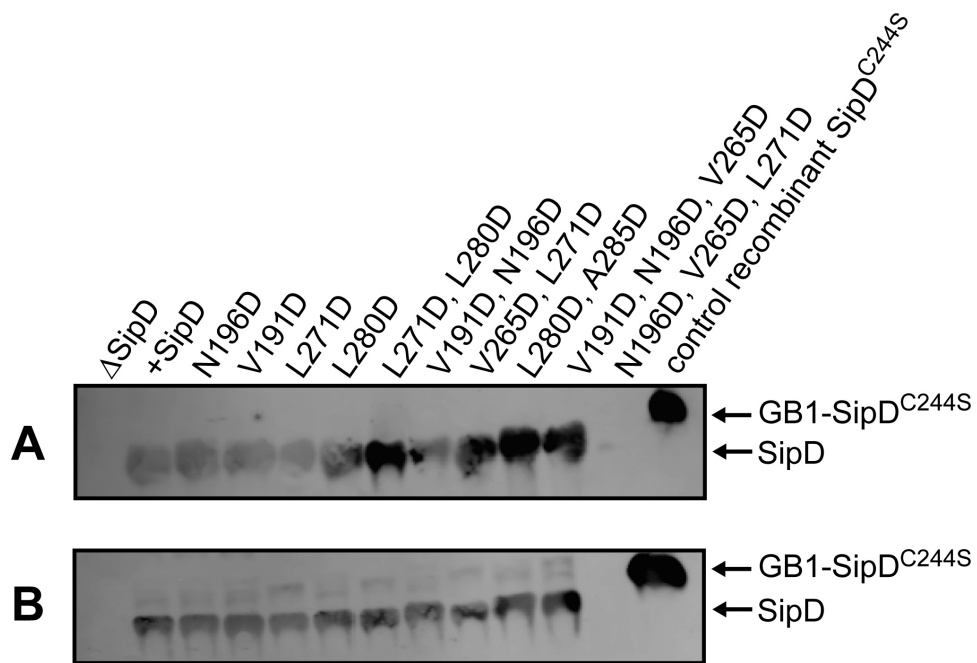

**Figure S8.** Immunoblotting using SipD antibodies of (A) cultured supernatants and (B) whole-cell lysates of *Salmonella typhimurium* strains containing *sipD* gene knockout ( $\Delta$ SipD), exogenous *sipD* introduced by a plasmid (+SipD), and exogeneous SipD with site directed mutants. Recombinant GB1-SipD<sup>C244S</sup> was used as a positive control.
